# Supplementary material for: DNA priming and gp120 boosting induces HIV-specific antibodies in a randomized clinical trial
Source: JCI journal article supplement (doi:10.1172/jci128699), 2019-09-30
Supplement: sd2 [file 2]

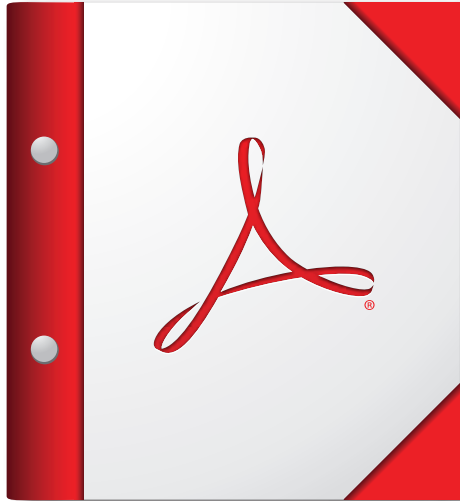

**For the best experience, open this PDF portfolio in  
Acrobat X or Adobe Reader X, or later.**

[Get Adobe Reader Now!](#)
